# Supplementary material
Source: bioRxiv or medRxiv preprint supplement (https://medrxiv.org/highwire/filestream/69451/field_highwire_adjunct_files/3/19008474-4.pdf)
Supplement: Supplementary file [file 19008474-4.pdf]

## Supplementary Materials 4: Further estimation details for models presented in main manuscript

NB this supplementary data is from: Richard M.A. Parker, George Leckie, Harvey Goldstein, Laura D. Howe, Jon Heron, Alun D. Hughes, David M. Phillippo, Kate Tilling. “Joint modelling of individual trajectories, within-individual variability and a later outcome: systolic blood pressure through childhood and left ventricular mass in early adulthood”

### Number of iterations (per chain; 4 chains run for each model)

15 000 iterations, including 5000 warm-up

The chains were run for such a length that the effective sample size for each parameter of interest indicated a reasonable number of independent draws ( $\geq 400$ ) from the posterior distribution. As such, the length of chain (above) is very generous, but was set for the one or two models with relatively high autocorrelation for certain parameters.

### Priors

For the fixed effects in the mean function for the repeatedly-measured outcome, and for the mean function for the individual-level outcome, we used the equivalent – had the variables been standardised – of  $\text{Normal}(\mu_{SBP}, \sigma = 10)$  for the intercept and  $\text{Normal}(0, \sigma = 2.5)$  for the other predictors, re-scaling as appropriate.<sup>1</sup>

Half-Cauchy( $x_0 = 0, \gamma = 10$ ) priors were used for the SDs for the individual-level random effects, and for the occasion-level SD in models in which this was assumed constant, whilst a prior of  $\text{LKJcorr}(2)$  was used for the correlation matrices for the random effects at the individual-level.<sup>2-5</sup>

For the fixed effects in the within-individual variability function we used Normal priors. For the intercept, the mean of the prior was the estimated within-individual variance (log-transformed) from a simpler (random slope) model, whilst the priors for the covariates had a mean of zero. For the SD of these priors, we used the equivalent – had the variables been standardised – of  $\sigma = 2.25$  for both the intercept and covariates. Since a change of  $\pm 2$ SDs (around the mean for the prior of the intercept) would have predicted a within-individual SD of between 0.6 and 51.3 (i.e. 4.6% of distribution of prior would predict values above/below this range), this was judged very weakly informative.

1. Gabry J, Goodrich B. Prior Distributions for rstanarm Models. <http://mc-stan.org/rstanarm/articles/priors> Accessed 7th February 2019, 2019.
2. Gelman A. Prior distributions for variance parameters in hierarchical models(Comment on an Article by Browne and Draper). *Bayesian Analysis* 2006;**1**(3):515-533.
3. Polson NG, Scott JG. On the Half-Cauchy Prior for a Global Scale Parameter. *Bayesian Analysis* 2012;**7**(4):887-901.
4. Stan Development Team. Stan User's Guide. 2.19.1 ed, 2018.
5. Lewandowski D, Kurowicka D, Joe H. Generating random correlation matrices based on vines and extended onion method. *Journal of Multivariate Analysis* 2009;**100**(9):1989-2001.
